# Supplementary material for: The Potential of Alternative Therapies and Vaccine Candidates against Helicobacter pylori
Source: MDPI journal article supplement (doi:10.3390/ph16040552), 2023-04-06
Supplement: s1 [file s1]

Table S1: List of natural products from plants from the studies included in this systematic review. N/A: the value or test was not tested from the respective study; MIC: minimal inhibitory concentration; MBC: Minimal bactericidal concentration.

| Authors                                           | Name of plant/<br>compound                                   | Fraction/compound<br>with best antibacterial<br>activity | Metabolite(s)<br>with anti <i>H.</i><br><i>pylori</i> activity | Assay<br>type                                        | MIC                                              | MBC                                                               | Mechanism                                                                     |
|---------------------------------------------------|--------------------------------------------------------------|----------------------------------------------------------|----------------------------------------------------------------|------------------------------------------------------|--------------------------------------------------|-------------------------------------------------------------------|-------------------------------------------------------------------------------|
| Eftekhari<br>et al.<br>(2021)<br>[22]             | <i>Oliveria decumbens</i> Vent.                              | n-hexane                                                 | N/A                                                            | disc<br>diffusion<br>and agar<br>dilution<br>methods | 50 µg/mL                                         | N/A                                                               | N/A                                                                           |
| Palacios-<br>Espinosa<br>et al.<br>(2021)<br>[23] | <i>Artemisia ludoviciana</i>                                 | Estafiatin and eupalitin                                 | Estafiatin and<br>eupalitin                                    | broth<br>microdilut<br>ion assay                     | 250 µg/mL                                        | 15.6<br>µg/mL<br>(estafiatin)<br>and 31.2<br>µg/mL<br>(eupalitin) | Anti-urease                                                                   |
| Lee et al.<br>(2018)<br>[24]                      | <i>Allium hookeri</i>                                        | Alliin; <i>Allium hookeri</i><br>extract                 | Alliin                                                         | disk agar<br>diffusion<br>method                     | Allin: 15.6 mm;<br>AHE 100<br>µg/mL (20.6<br>mm) | N/A                                                               | Anti-urease and<br>gastroprotection                                           |
| Stenger<br>Moura et<br>al. (2021)<br>[25]         | <i>Mimusops balata</i><br>(Sapotaceae) edible<br>fruits      | Taxifolin                                                | Taxifolin                                                      | broth<br>microdilut<br>ion assay                     | 625 µg/mL                                        | N/A                                                               | Reduced ulcer and anti-<br>oxidant                                            |
| Lu et al.<br>(2020)<br>[26]                       | <i>Zanthoxylum nitidum</i><br>(Roxb.) DC.                    | Root aqueous extract                                     | N/A                                                            | N/A                                                  | N/A                                              | N/A                                                               | Anti-urease                                                                   |
| Ngnosek<br>o et al.<br>(2020)<br>[27]             | <i>Spathodea<br/>campanulata</i> P. Beauv.<br>(Bignoniaceae) | SB2, SE3 and flavonol<br>kaempferol                      | SB2, SE3 and<br>flavonol<br>kaempferol                         | N/A                                                  | N/A                                              | N/A                                                               | Anti-urease; Anti <i>H. pylori</i><br>adhesins; Anti <i>H. pylori</i><br>CagA |

|                                   |                                                                  |                                            |              |                           |                                                                                                                 |                                                              |                                                                                                              |
|-----------------------------------|------------------------------------------------------------------|--------------------------------------------|--------------|---------------------------|-----------------------------------------------------------------------------------------------------------------|--------------------------------------------------------------|--------------------------------------------------------------------------------------------------------------|
| Park et al. (2018) [28]           | Hwanglyeonhaedok-tang (HHT) (combination of plants)              | Water decoction                            | N/A          | N/A                       | N/A                                                                                                             | N/A                                                          | Reduced <i>H. pylori</i> colonization and anti-inflammatory                                                  |
| Ngan et al. (2021) [29]           | <i>Hibiscus rosa-sinensis</i> red flower                         | ethyl acetate fraction                     | N/A          | broth microdilution assay | 0.2-0.25 mg/mL                                                                                                  | 1.25-1.5 mg/mL                                               | Antibiofilm activity; conversion of bacteria to coccoid form                                                 |
| Park et al. (2019) [30]           | Lycopene (L9879, Sigma-Aldrich)                                  | Lycopene                                   | Lycopene     | N/A                       | N/A                                                                                                             | N/A                                                          | Reduced expression of cellular signalling important in gastric carcinogenesis                                |
| Salinas Ibáñez et al. (2021) [31] | <i>Solanum granuloso-leprosum</i> (Dunal)                        | Granulosin I and proteolytic extract (RAP) | Granulosin I | broth microdilution assay | All strains susceptible granulosin I with MIC from 156.25 to 312.5 µg/mL ; RAP with MIC from 312.5 to 625 µg/mL | granulosin I: 312.5 to 625 µg/mL; 625 to 1,250 µg/mL for RAP | Significantly decreased the expression of pathogenic factors: <i>omp18</i> , <i>ureA</i> , and <i>flaA</i> . |
| Jin et al. (2020) [32]            | <i>Curcuma wenyujin</i>                                          | n-Butyl alcohol extract                    | N/A          | N/A                       | N/A                                                                                                             | N/A                                                          | Suppressed effects induced by <i>H. pylori</i> CagA and VacA                                                 |
| Wang et al. (2018) [33]           | <i>Physalis alkekengi</i> L. var. <i>franchetii</i> (Solanaceae) | Ethyl acetate fraction                     | N/A          | disk diffusion method     | 500µg/ml                                                                                                        | N/A                                                          | Reduced inflammation; gastroprotective                                                                       |
| Fahmy et al. (2020) [34]          | <i>Erythrina speciosa</i> (Fabaceae)                             | Acetate fraction                           | N/A          | broth microdilution assay | 31.25 µg/mL                                                                                                     | N/A                                                          | Gastroprotective and anti-inflammatory                                                                       |

|                                    |                                                                                       |                                      |                                             |                                          |                                                           |                |                                                                                                                                                                                      |
|------------------------------------|---------------------------------------------------------------------------------------|--------------------------------------|---------------------------------------------|------------------------------------------|-----------------------------------------------------------|----------------|--------------------------------------------------------------------------------------------------------------------------------------------------------------------------------------|
| Lee et al.<br>(2019)<br>[35]       | <i>Rubus crataegifolius</i> , <i>Gardenia jasminoides</i> and <i>Ulmus macrocarpa</i> | Standardized plant extracts          | N/A                                         | N/A                                      | N/A                                                       | N/A            | Reduced bacterial load and inflammation                                                                                                                                              |
| Jung et al.<br>(2020)<br>[36]      | H-002119-00-001 from $\beta$ -caryophyllene                                           | H-002119-00-001                      | H-002119-00-001 from $\beta$ -caryophyllene | N/A                                      | N/A                                                       | N/A            | Improved inflammation and decreased bacterial burden                                                                                                                                 |
| Li et al.<br>(2022)<br>[37]        | <i>Forsythia</i>                                                                      | Phillygenin                          | Phillygenin                                 | broth microdilution assay                | 16-32 $\mu$ g/ml                                          | 128 $\mu$ g/ml | Caused ATP leakage in <i>H. pylori</i> cells; antibiofilm; downregulated <i>H. pylori</i> 's acid resistance, DNA methylation and capacity for drug efflux; improved immune response |
| Eftekhari et al.<br>(2019)<br>[38] | <i>Oliveria decumbens</i>                                                             | Essential oils and thymol            | Essential oils and thymol                   | disc diffusion and agar dilution methods | essential oil: 20.4 $\mu$ g/mL and thymol: 150 $\mu$ g/mL | N/A            | N/A                                                                                                                                                                                  |
| Brito et al.<br>(2018)<br>[39]     | <i>Spondias mombin</i> L.                                                             | Ethanollic extract                   | N/A                                         | broth microdilution                      | 256 $\mu$ g/mL                                            | N/A            | N/A                                                                                                                                                                                  |
| Prazeres et al.<br>(2019)<br>[40]  | <i>L. ferrea</i>                                                                      | Dry extract of <i>L. ferrea</i> pods | N/A                                         | broth microdilution                      | 512 $\mu$ g/mL                                            | 512 $\mu$ g/mL | N/A                                                                                                                                                                                  |

|                            |                                                                                |                                                     |                                                            |                            |                                                                              |                           |                                                                                                                                                                                            |
|----------------------------|--------------------------------------------------------------------------------|-----------------------------------------------------|------------------------------------------------------------|----------------------------|------------------------------------------------------------------------------|---------------------------|--------------------------------------------------------------------------------------------------------------------------------------------------------------------------------------------|
| Wylie et al. (2022) [41]   | <i>Azadirachta indica</i> A. Juss                                              | Nimbolide                                           | Nimbolide                                                  | broth microdilution        | 1.25–5 µg/mL                                                                 | 2.5–10 µg/mL              | N/A                                                                                                                                                                                        |
| Peng et al. (2022) [42]    | <i>Syzygium aromaticum</i>                                                     | Aqueous extract and 75% hydroalcoholic extract (HE) | N/A                                                        | broth microdilution method | 160-320 µg/ml for both antibiotic susceptible and resistant <i>H. pylori</i> | AE<4MIC while HE 2-16 MIC | altered the morphology and ultrastructure and down-regulated the virulence genes expression of <i>H. pylori</i> ; combated the abnormal activation of PI3K-Akt and MAPK signaling pathways |
| Sabry et al. (2022) [43]   | <i>Cordia africana</i> Lam.                                                    | Methyl rosmarinate                                  | Methyl rosmarinate                                         | broth microdilution method | 31.25 ± 0.6 µg/mL                                                            | N/A                       | N/A                                                                                                                                                                                        |
| Almeida et al. (2019) [44] | <i>Viola elongata</i>                                                          | The stem bark hydroethanolic extract of the plant   | N/A                                                        | broth microdilution method | No direct activity                                                           | No direct activity        | gastroprotective                                                                                                                                                                           |
| So et al. (2019) [45]      | <i>Ulmus davidiana</i> var. japonica                                           | Compounds 1, 11, 18, and 20                         | new chromane derivative, coumarins, and phenolic compounds | broth microdilution method | 25 or 50 µM against two strains of <i>H. pylori</i> 51 and 43504             | N/A                       | N/A                                                                                                                                                                                        |
| Sreeja et al. (2018) [46]  | <i>Sphenodesme involucrata</i> var. paniculata (C.B. Clarke) Munir (Lamiaceae) | Methanol extract                                    | N/A                                                        | broth microdilution        | 100 µg/mL                                                                    | N/A                       | N/A                                                                                                                                                                                        |

|                                         |                                                |                                       |          |                           |                                                                      |     |                                      |
|-----------------------------------------|------------------------------------------------|---------------------------------------|----------|---------------------------|----------------------------------------------------------------------|-----|--------------------------------------|
| de Cássia Dos Santos et al. (2019) [47] | <i>Byrsonima intermedia</i> A. Juss partitions | Partitions of water and ethyl acetate | N/A      | broth microdilution assay | Ethyl acetate partition>0.1000 mg/mL and water partition=0.500 mg/mL | N/A | Gastroprotective                     |
| Abdel-Baki et al. (2022) [48]           | <i>Iris confusa</i>                            | Polar fractions and iregenin          | Ireginin | broth microdilution assay | 62.50 µg/mL                                                          | N/A | Potential COX2 inhibitor             |
| Kim et al. (2022) [49]                  | Korean red ginseng extract                     | Water extract                         | N/A      | N/A                       | N/A                                                                  | N/A | Decreased IL-8; antioxidant activity |

References (as arranged in Reference section in the paper):

22. Eftekhari, M.; Shams Ardekani, M. R.; Amin, M.; Mansourian, M.; Saeedi, M.; Akbarzadeh, T.; Khanavi, M. Anti-*Helicobacter pylori* compounds from *Oliveria decumbens* Vent. through urease inhibitory in-vitro and in-silico studies. *Iran J Pharm Res* **2021**, *20*, 476–489.
23. Palacios-Espinosa, J. F.; Núñez-Aragón, P. N.; Gomez-Chang, E.; Linares, E.; Bye, R.; Romero, I. Anti-*Helicobacter pylori* activity of *Artemisia ludoviciana* subsp. *mexicana* and two of its bioactive components, estafiatin and eupatilin. *Molecules (Basel)* **2021**, *26*, 3654.
24. Lee, H. A.; Hong, S.; Yoo, J. H.; Chung, Y.; Kim, O. Anti-*Helicobacter pylori* activity and inhibition of gastritis by *Allium hookeri* extract. *Lab Anim Res* **2018**, *34*, 75–79.
25. Stenger Moura, F. C.; Cechinel-Filho, V.; Greco, F. A.; Venzon, L.; Meurer, M. C.; França, T. C. D. S.; Longo, B.; Somensi, L. B.; Mariano, L. N. B.; Cruz, A. B.; Macchiarulo, A.; Schoubben, A.; Ricci, M.; Belle Bresolin, T. M.; da Silva, L. M. (2021). Taxifolin and gastro-adhesive microparticles containing taxifolin promotes gastric healing in vivo, inhibits *Helicobacter pylori* in vitro and proton pump reversibly in silico. *Chem Biol Interact* **2021**, *339*, 109445.
26. Lu, Q.; Li, C.; Wu, G. Insight into the inhibitory effects of *Zanthoxylum nitidum* against *Helicobacter pylori* urease and jack bean urease: Kinetics and mechanism. *J Ethnopharmacol* **2020**, *249*, 112419.

27. Ngnameko, C. R.; Marchetti, L.; Zambelli, B.; Quotadamo, A.; Roncarati, D.; Bertelli, D.; Njyou, F. N.; Smith, S. I.; Moundipa, P. F.; Costi, M. P.; Pellati, F. New insights into bioactive compounds from the medicinal plant *Spathodea campanulata* P. Beauv. and their activity against *Helicobacter pylori*. *Antibiotics (Basel)* **2020**, *9*, 258.
28. Park, H. S.; Wijerathne, C. U. B.; Jeong, H. Y.; Seo, C. S.; Ha, H.; Kwun, H. J. Gastroprotective effects of Hwanglyeonhaedok-tang against *Helicobacter pylori*-induced gastric cell injury. *J Ethnopharmacol* **2018**, *216*, 239–250.
29. Ngan, L. T. M.; Tan, M. T.; Hoang, N. V. M.; Thanh, D. T.; Linh, N. T. T.; Hoa, T. T. H.; Nuong, N. T. M.; Hieu, T. T. Antibacterial activity of *Hibiscus rosa-sinensis* L. red flower against antibiotic-resistant strains of *Helicobacter pylori* and identification of the flower constituents. *Brazil J Med Biol Res* **2021**, *54*, e10889.
30. Park, B., Lim, J. W., & Kim, H. Lycopene treatment inhibits activation of Jak1/Stat3 and Wnt/ $\beta$ -catenin signaling and attenuates hyperproliferation in gastric epithelial cells. *Nutr Res* **2019**, *70*, 70–81.
31. Salinas Ibáñez, Á. G.; Vallés, D.; Adaro, M.; Barberis, S., & Vega, A. E. Antimicrobial effect of a proteolytic enzyme from the fruits of *Solanum granuloso-leprosum* (Dunal) against *Helicobacter pylori*. *Front Nutr* **2021**, *8*, 699955.
32. Jin, H. F.; Dai, J. F.; Meng, L. N.; Lu, B. Curcuma wenyujin Y. H. Chen et C. Ling n-butyl alcohol extract inhibits AGS cell *Helicobacter pylori* CagA+VacA+ promoted invasiveness by down-regulating caudal type homeobox transcription factor and claudin-2 expression. *Chin J Integr Med* **2020**, *26*, 122–129.
33. Wang, Y.; Wang, S. L.; Zhang, J. Y.; Song, X. N.; Zhang, Z. Y.; Li, J. F.; Li, S. Anti-ulcer and anti-*Helicobacter pylori* potentials of the ethyl acetate fraction of *Physalis alkekengi* L. var. *franchetii* (Solanaceae) in rodent. *J Ethnopharmacol* **2018**, *211*, 197–206.
34. Fahmy, N. M.; Al-Sayed, E.; Michel, H. E.; El-Shazly, M.; Singab, A. N. B. Gastroprotective effects of *Erythrina speciosa* (Fabaceae) leaves cultivated in Egypt against ethanol-induced gastric ulcer in rats. *J Ethnopharmacol* **2020**, *248*, 112297.
35. Lee, Y. I.; Kim, J. S.; Cho, J. S.; Kim, H. K.; Hussain, A. Standardized combined plant extract, RUG-com, reduces bacterial levels and suppresses acute and chronic inflammation in Balb/c mice infected with CagA+ *Helicobacter pylori*. *Prev Nutr Food Sci* **2019**, *24*, 426–433.
36. Jung, D. H.; Park, M. H.; Kim, C. J.; Lee, J. Y.; Keum, C. Y.; Kim, I. S.; Yun, C. H.; Kim, S. K.; Kim, W. H.; Lee, Y. C. Effect of  $\beta$ -caryophyllene from cloves extract on *Helicobacter pylori* eradication in mouse model. *Nutrients* **2020**, *12*, 1000.
37. Li, R. J.; Qin, C.; Huang, G. R.; Liao, L. J.; Mo, X. Q.; Huang, Y. Q. Phillygenin inhibits *Helicobacter pylori* by preventing biofilm formation and inducing ATP leakage. *Front Microbiol* **2022**, *13*, 863624.

38. Eftekhari, M.; Shams Ardekani, M. R.; Amin, M.; Attar, F.; Akbarzadeh, T.; Safavi, M.; Karimpour-Razkenari, E.; Amini, M.; Isman, M.; Khanavi, M. *Oliveria decumbens*, a bioactive essential oil: chemical composition and biological activities. *Iran J Pharm Res* **2019**, *18*, 412–421.
39. Brito, S. A.; de Almeida, C. L. F.; de Santana, T. I.; da Silva Oliveira, A. R.; do Nascimento Figueiredo, J. C. B.; Souza, I. T.; de Almeida, L. L.; da Silva, M. V.; Borges, A. S.; de Medeiros, J. W.; da Costa Silva Neto, J.; de Cássia Ribeiro Gonçalves, R.; Kitagawa, R. R.; Sant'Ana, A. E. G.; Rolim, L. A.; de Menezes, I. R. A.; da Silva, T. G.; Caldas, G. F. R.; Wanderley, A. G. Antiulcer activity and potential mechanism of action of the leaves of *Spondias mombin* L. *Oxid Med Cell Longev* **2018**, 1731459.
40. Prazeres, L. D. K. T.; Aragão, T. P.; Brito, S. A.; Almeida, C. L. F.; Silva, A. D.; de Paula, M. M. F.; Farias, J. S.; Vieira, L. D.; Damasceno, B. P. G. L.; Rolim, L. A.; Veras, B. O.; Rocha, I. G.; Silva Neto, J. C.; Bittencourt, M. L. F.; Gonçalves, R. C. R.; Kitagawa, R. R.; Wanderley, A. G. Antioxidant and antiulcerogenic activity of the dry extract of pods of *Libidibia ferrea* Mart. ex Tul. (Fabaceae). *Oxid Med Cell Longev* **2019**, 1983137.
41. Wylie, M. R.; Windham, I. H.; Blum, F. C.; Wu, H.; Merrell, D. S. In vitro antibacterial activity of nimbolide against *Helicobacter pylori*. *J Ethnopharmacol* **2022**, 285, 114828.
42. Peng, C.; Sang, S.; Shen, X.; Zhang, W.; Yan, J.; Chen, P.; Jiang, C.; Yuan, Y.; Zhu, W.; Yao, M. In vitro anti-*Helicobacter pylori* activity of *Syzygium aromaticum* and the preliminary mechanism of action. *J Ethnopharmacol* **2022**, 288, 114995.
43. Sabry, M. M.; El-Fishawy, A. M.; El-Rashedy, A. A.; El Gedaily, R. A. Phytochemical investigation of *Cordia africana* Lam. stem bark: molecular simulation approach. *Molecules (Basel)* **2022**, *27*, 4039.
44. Almeida, G. V. B.; Arunachalam, K.; Balogun, S. O.; Pavan, E.; Ascêncio, S. D.; Soares, I. M.; Zanatta, A. C.; Vilegas, W.; Macho, A.; Oliveira Martins, D. T. Chemical characterization and evaluation of gastric antiulcer properties of the hydroethanolic extract of the stem bark of *Virola elongata* (Benth.) Warb. *J Ethnopharmacol* **2019**, *231*, 113–124.
45. So, H. M.; Yu, J. S.; Khan, Z.; Subedi, L.; Ko, Y. J.; Lee, I. K.; Park, W. S.; Chung, S. J.; Ahn, M. J.; Kim, S. Y.; Kim, K. H. Chemical constituents of the root bark of *Ulmus davidiana* var. japonica and their potential biological activities. *Bioorg Chem* **2019**, *91*, 103145.
46. Sreeja, P. S.; Arunachalam, K.; Saikumar, S.; Kasipandi, M.; Dhivya, S.; Murugan, R.; Parimelazhagan, T. Gastroprotective effect and mode of action of methanol extract of *Sphenodesme involucrata* var. paniculata (C.B. Clarke) Munir (Lamiaceae) leaves on experimental gastric ulcer models. *Biomed Pharmacother* **2018**, *97*, 1109–1118.
47. de Cássia Dos Santos, R.; Bonamin, F.; Périco, L. L.; Rodrigues, V. P.; Zanatta, A. C.; Rodrigues, C. M.; Sannomiya, M.; Dos Santos Ramos, M. A.; Bonifácio, B. V.; Bauab, T. M.; Tamashiro, J.; da Rocha, L. R. M.; Vilegas, W.; Hiruma-Lima, C. A. *Byrsonima intermedia* A. Juss partitions promote gastroprotection against peptic ulcers and improve healing through antioxidant and anti-inflammatory activities. *Biomed Pharmacother* **2019**, *111*, 1112–1123.

48. Abdel-Baki, P. M.; El-Sherei, M. M.; Khaleel, A. E.; Abdel-Aziz, M. M.; Okba, M. M. Iridogenin, a novel lead from *Iris confusa* for management of *Helicobacter pylori* infection with selective COX-2 and HpIMPDH inhibitory potential. *Sci Rep* **2022**, *12*, 11457.
49. Kim, H. S.; Lim, J. W.; Kim, H. Korean red ginseng extract inhibits IL-8 expression via Nrf2 activation in *Helicobacter pylori*-infected gastric epithelial cells. *Nutrients* **2022**, *14*, 1044.
